# Supplementary material for: A molecular breakwater-like tetrapod for organic solar cells
Source: Royal Society of Chemistry journal article supplement (doi:10.1039/c4ta05405a), 2014-12-03

## Supporting Information

### A Molecular Breakwater-Like Tetrapod for Organic Solar Cells

Jianzhong Yang,<sup>a</sup> Wenhan He,<sup>a</sup> Kimberly Denman,<sup>b</sup> Ying-Bing Jiang<sup>c</sup> and Yang Qin<sup>\*a</sup>

<sup>a</sup> Department of Chemistry & Chemical Biology, University of New Mexico, MSC03-2060, Albuquerque, NM 87131, USA.

<sup>b</sup> Cottonwood Classical Preparatory School, 801 Jefferson Street NE, Albuquerque, NM 87109, USA.

<sup>c</sup> TEM & FIB Laboratories, University of New Mexico, Albuquerque, 87131, USA.

\* Corresponding Author. Email: [yangqin@unm.edu](mailto:yangqin@unm.edu)

(A) Front View

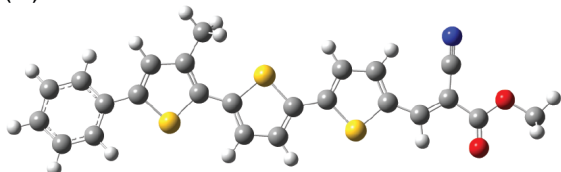

(B) Side View

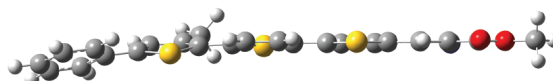

(C) HOMO: -5.3 eV

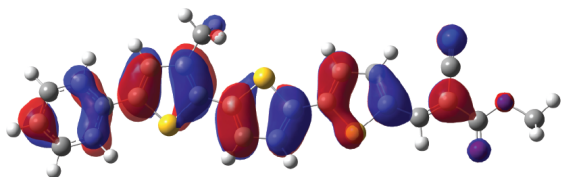

(D) LUMO: -2.7 eV

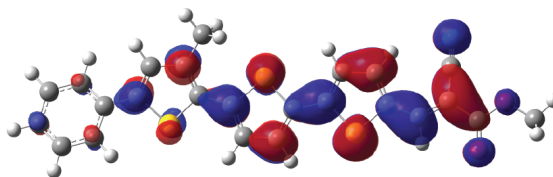

**Figure S1.** Density functional theory (DFT) calculation results (B3LYP/6-31G\*) of MO.

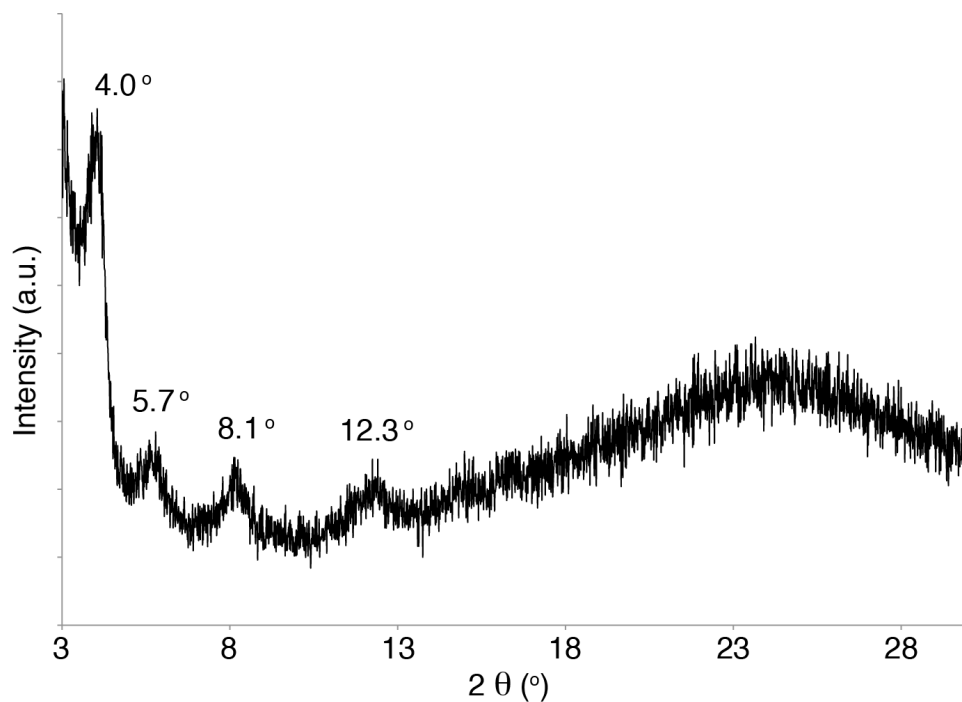

**Figure S2.** Wide-angle X-ray scattering profiles of **SO** thin films deposited on glass.

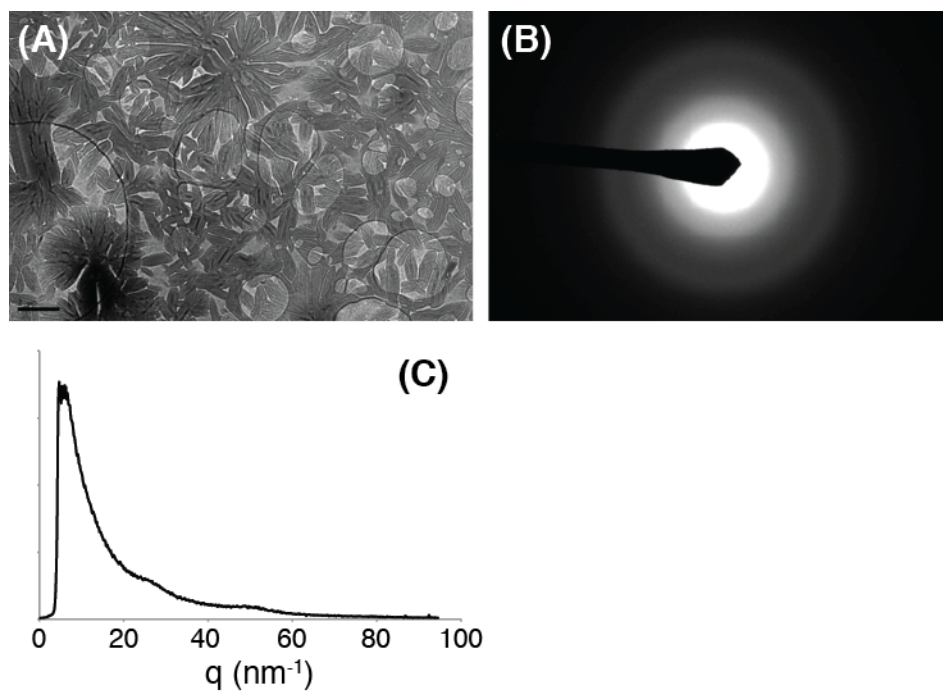

**Figure S3.** Transmission electron microscopy (TEM) image (A), selected area electron diffraction (SAED) images (B) and azimuthal integration curve of the SAED pattern (C) of as-cast **SO** thin films. Scale bar in A: 2  $\mu\text{m}$ .

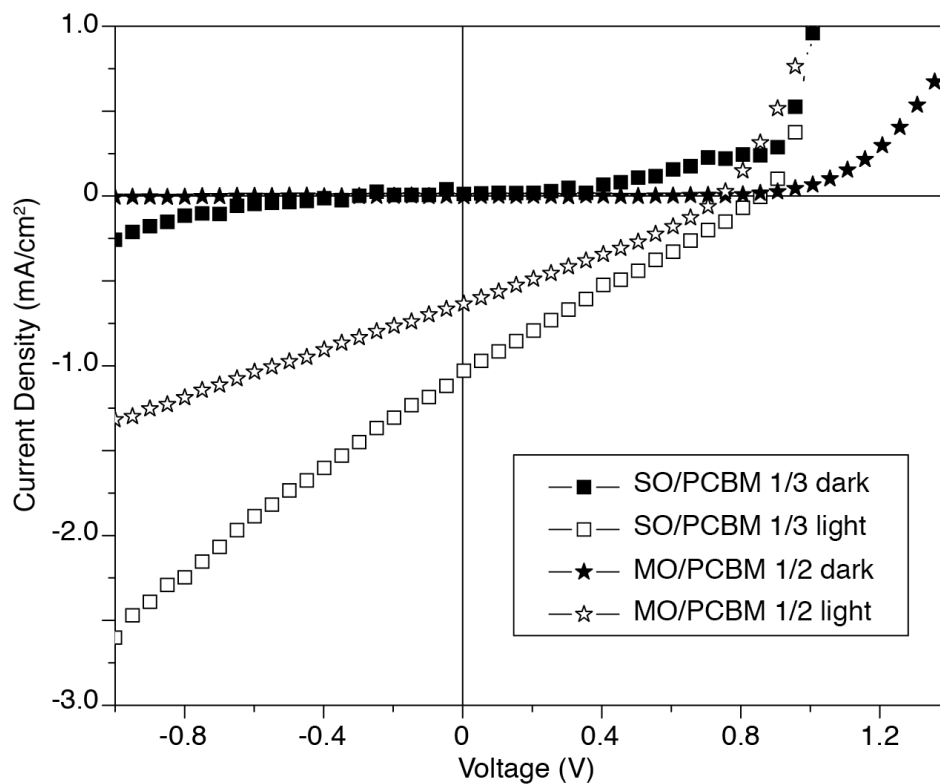

**Figure S4.** Current density-voltage (I-V) curves of solar cells employing **SO** or **MO** and PCBM in dark and under simulate solar light ( $100 \text{ mW/cm}^2$ ).

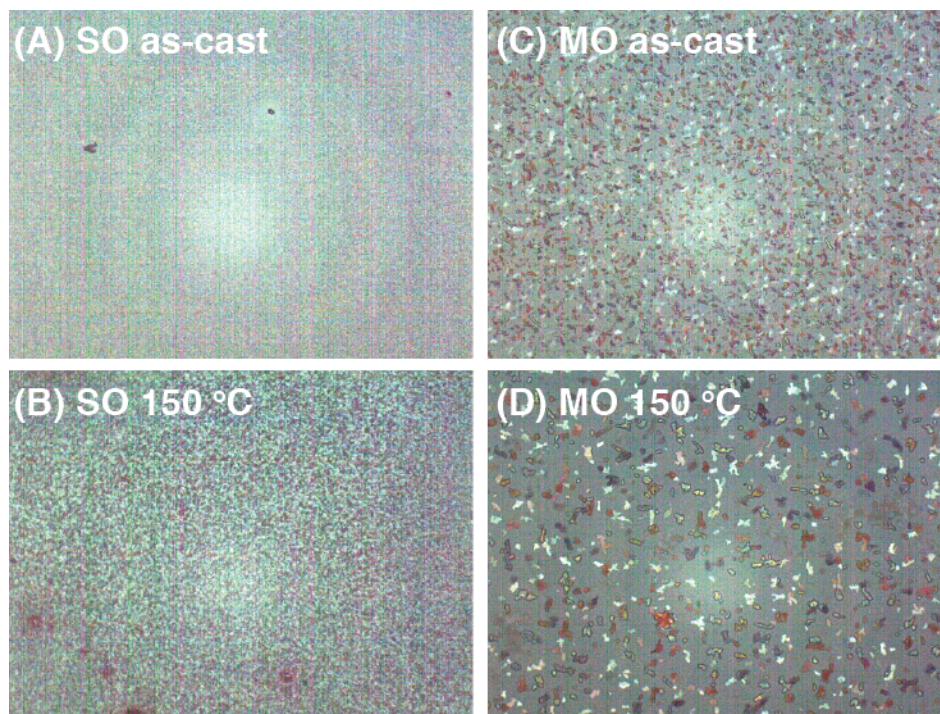

**Figure S5.** Cross-polarized light micrographs ( $400\times$  magnification) of thin films of **SO** and **MO** under different annealing conditions.

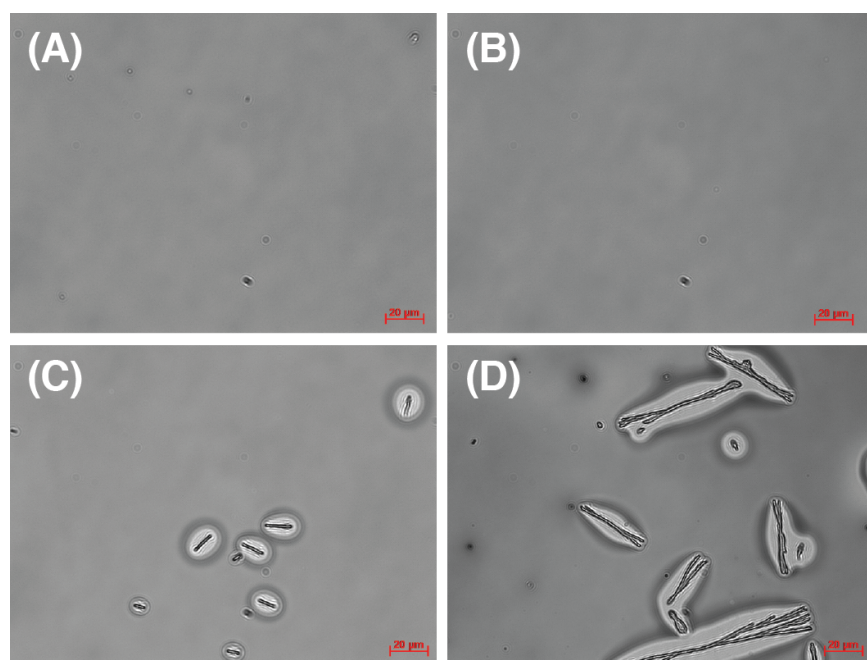

**Figure S6.** Optical micrographs ( $400\times$  magnification) of SO/PCBM (1/3) devices after slow cooling from (A)  $100\text{ }^{\circ}\text{C}$ , (B)  $150\text{ }^{\circ}\text{C}$ , (C)  $200\text{ }^{\circ}\text{C}$  and (D)  $250\text{ }^{\circ}\text{C}$ . Scale bars in all:  $20\text{ }\mu\text{m}$ .

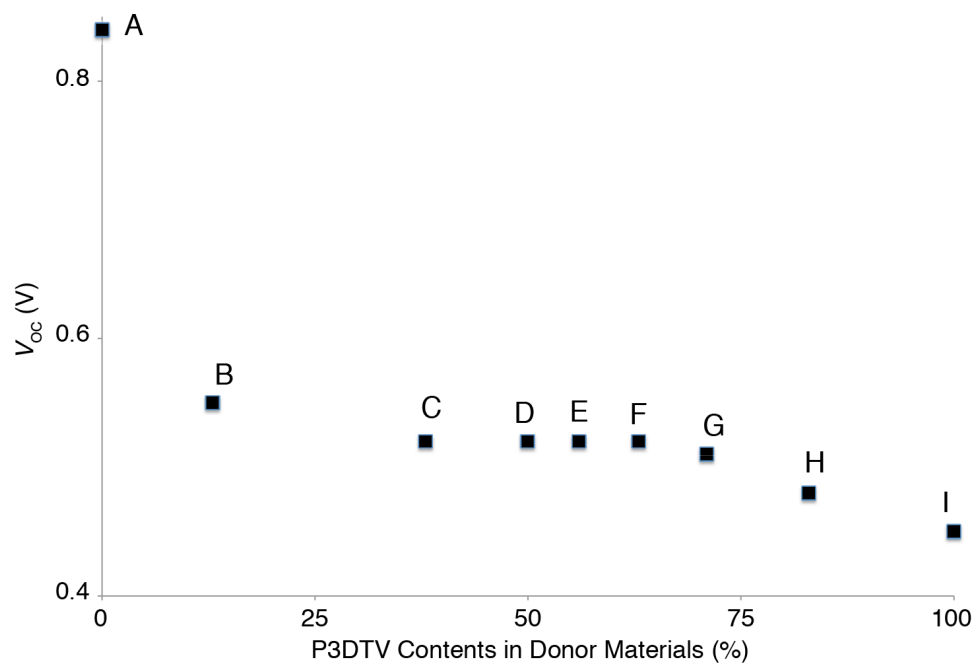

**Figure S7.** Open circuit voltage ( $V_{oc}$ ) versus P3DTV contents in donor materials of various solar cell devices. See Table 1 for labeling details.

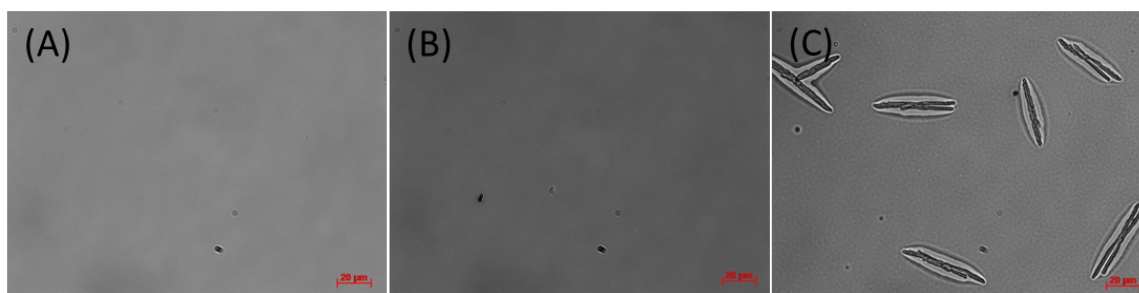

**Figure S8.** Optical micrographs (400 X magnification) of device F containing SO/P3DTV/PCBM (1.5/2.5/7.0) blend films: (A) as cast; (B) annealed at 80 °C for 10 min; (C) annealed at 150 °C for 10 min. Scale bars in all: 20 μm.

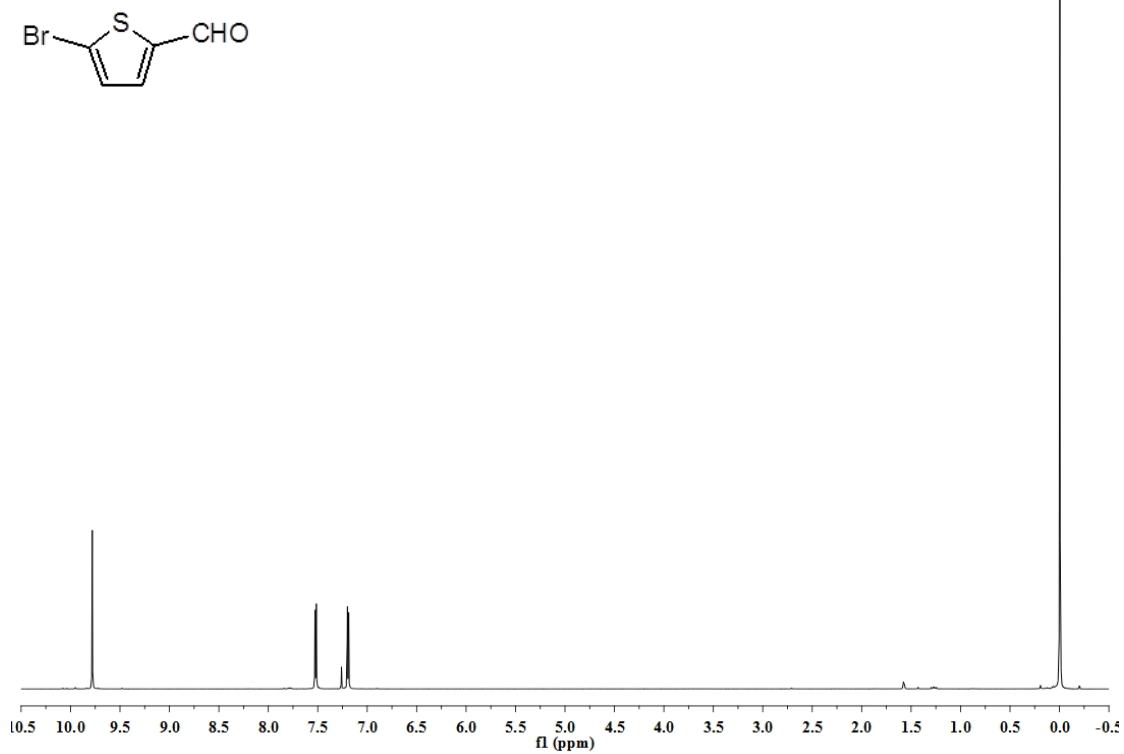

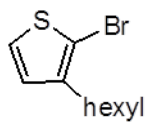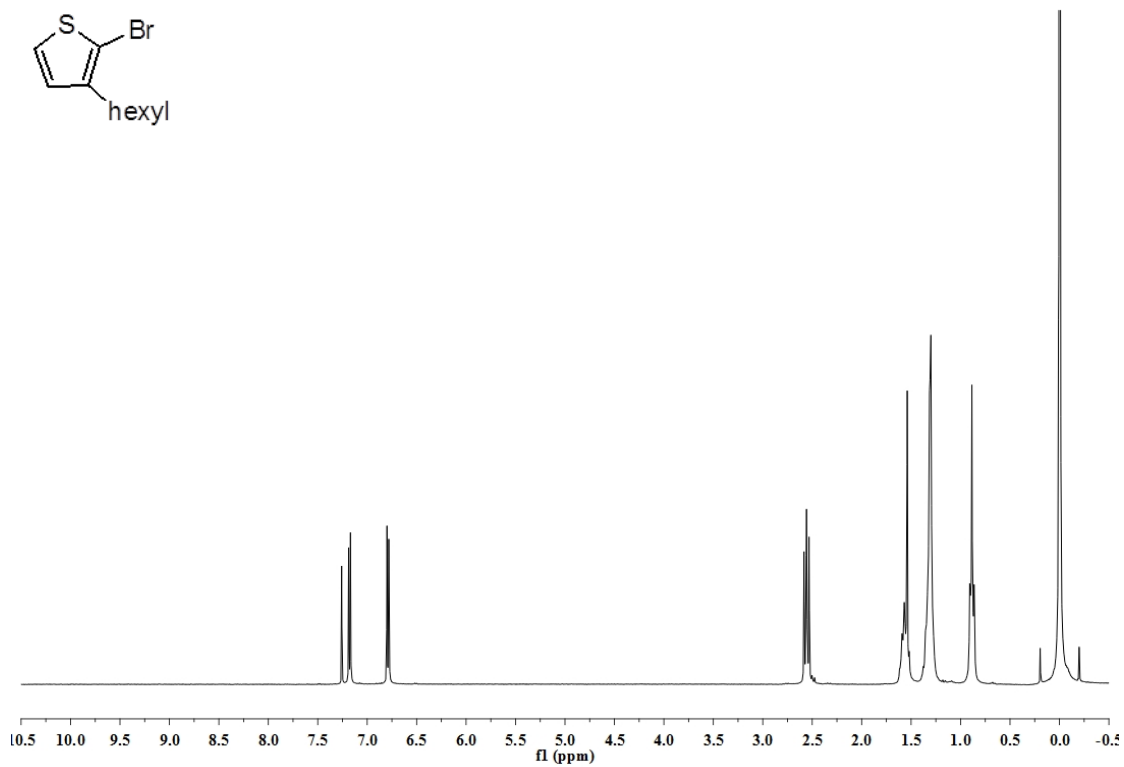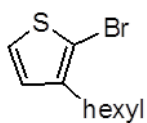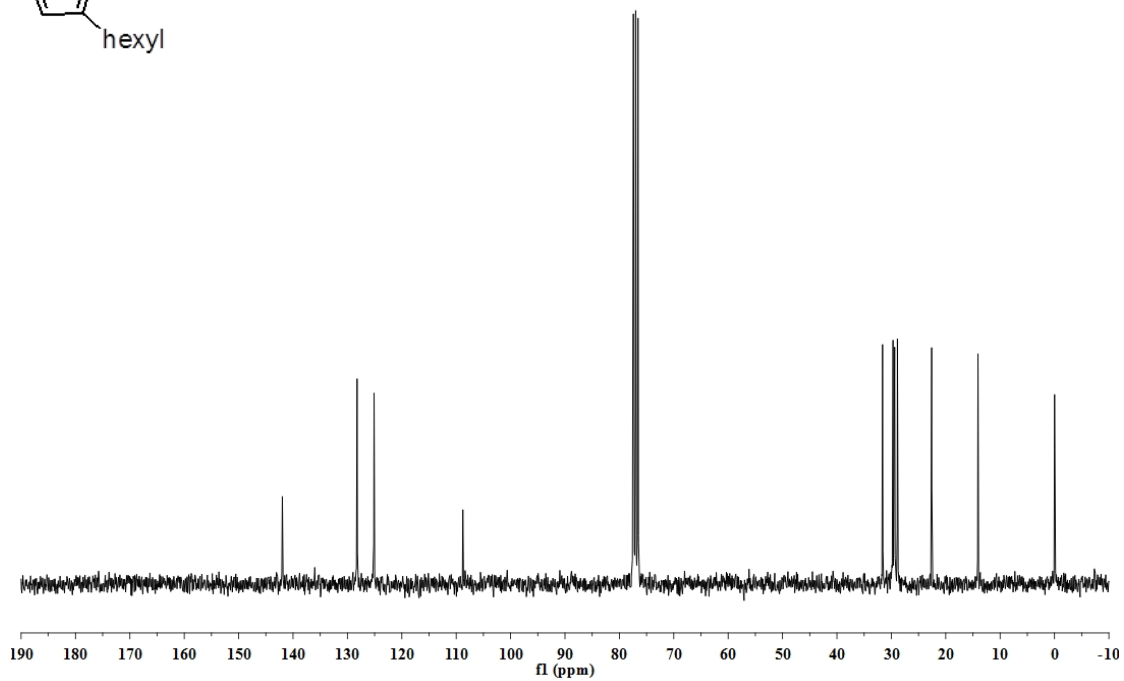

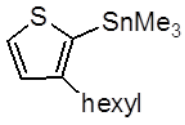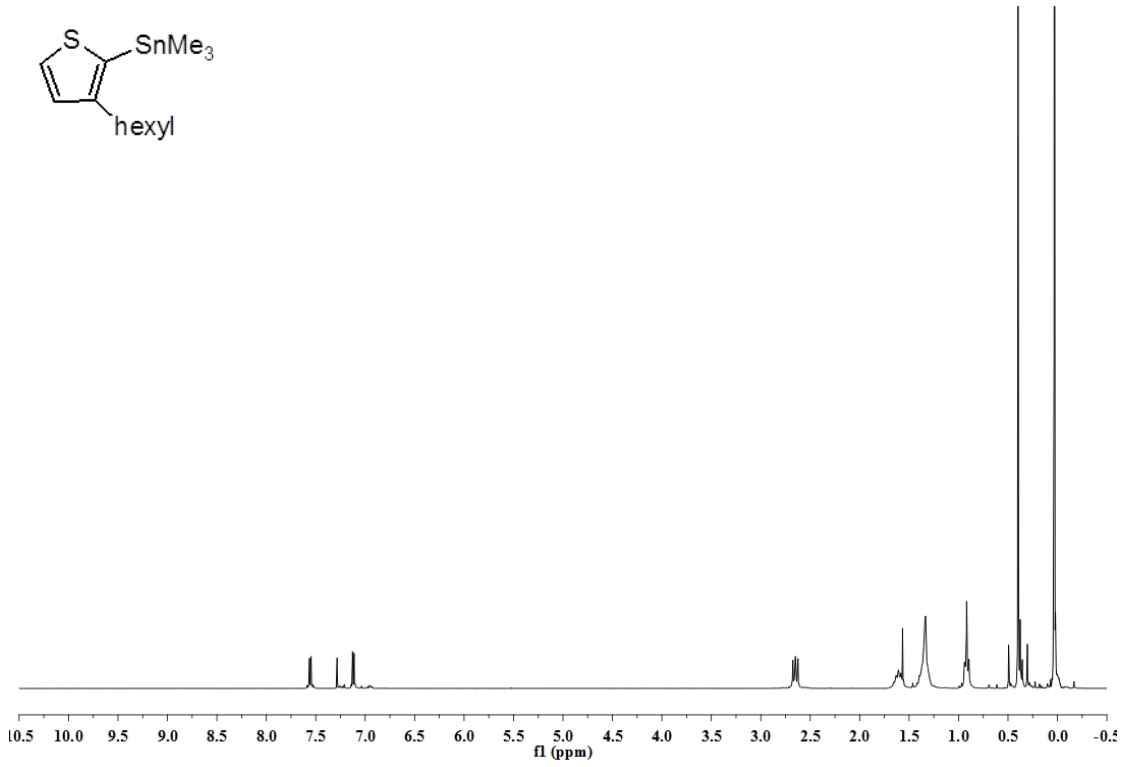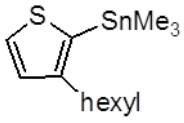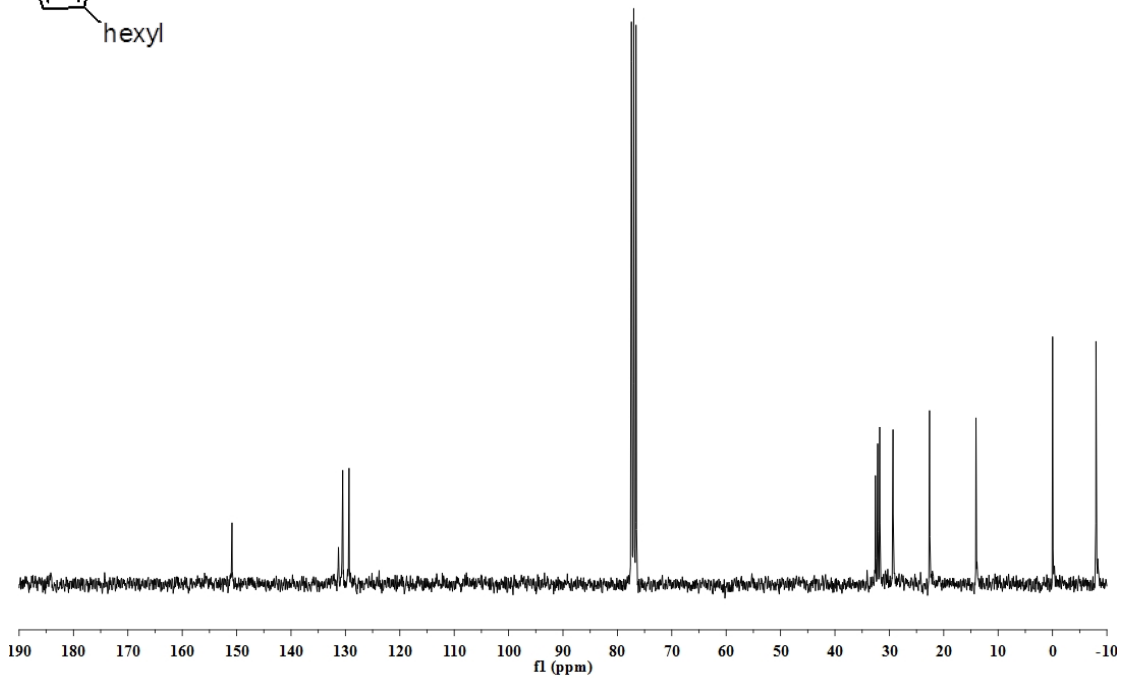

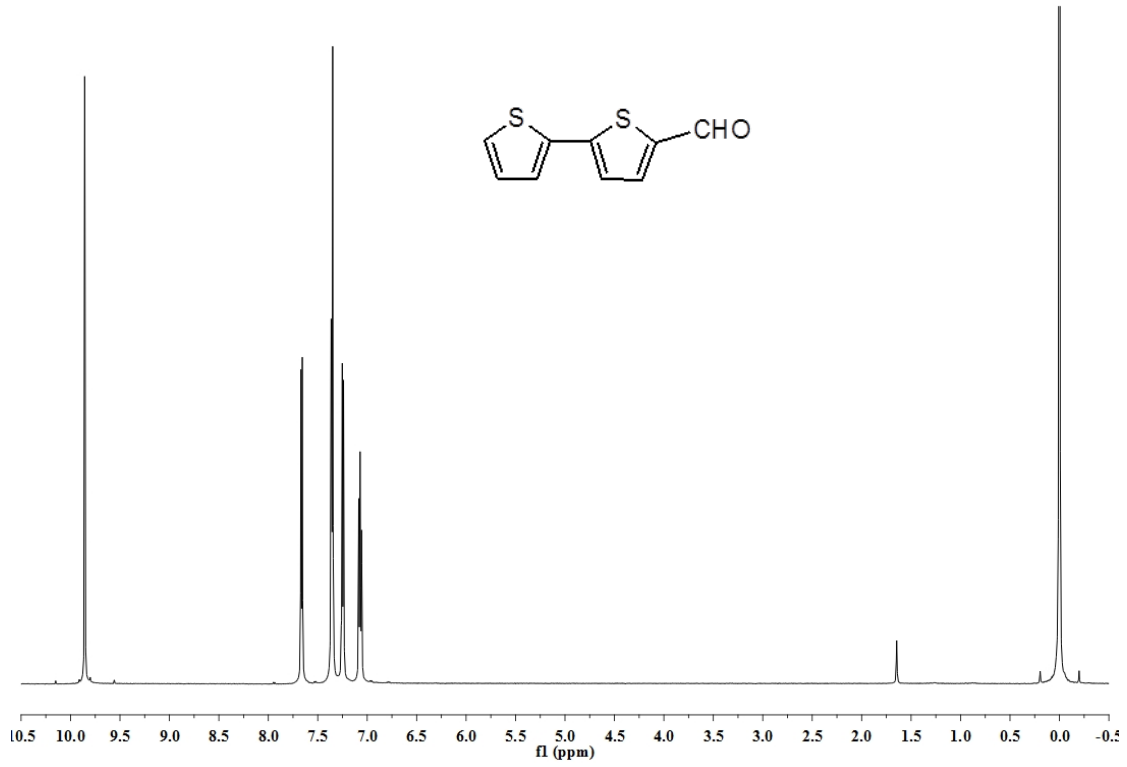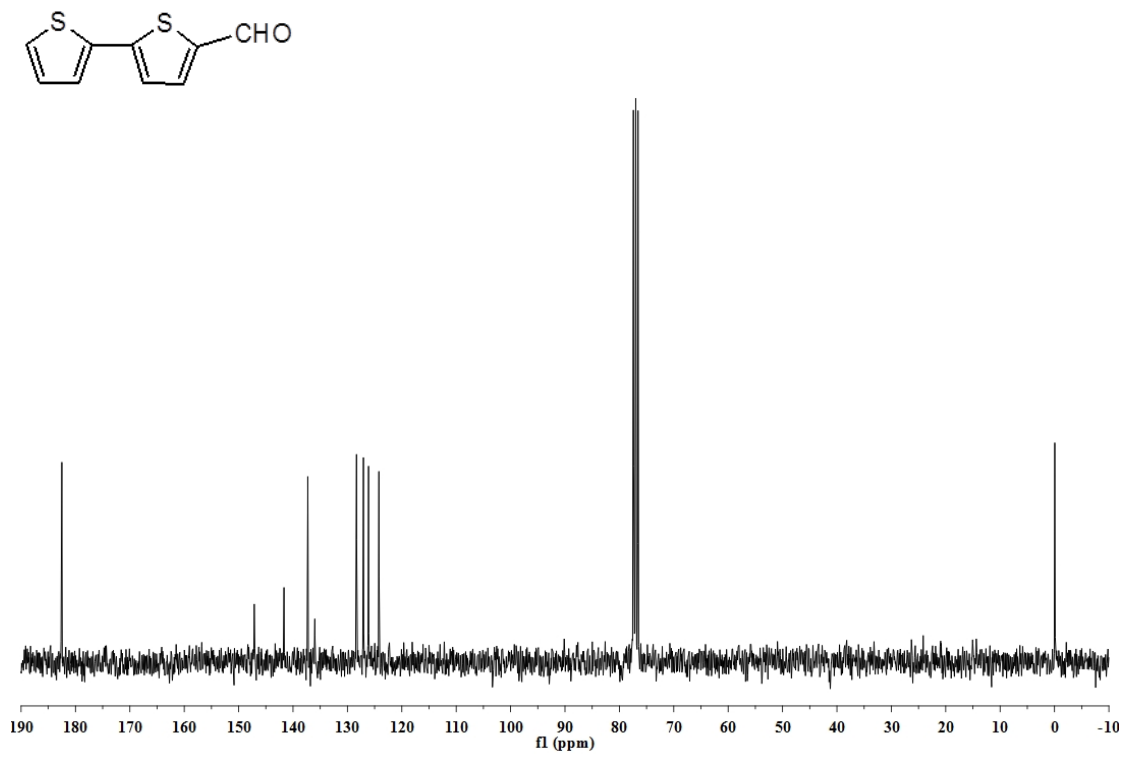



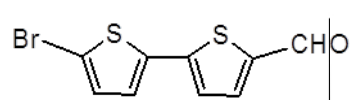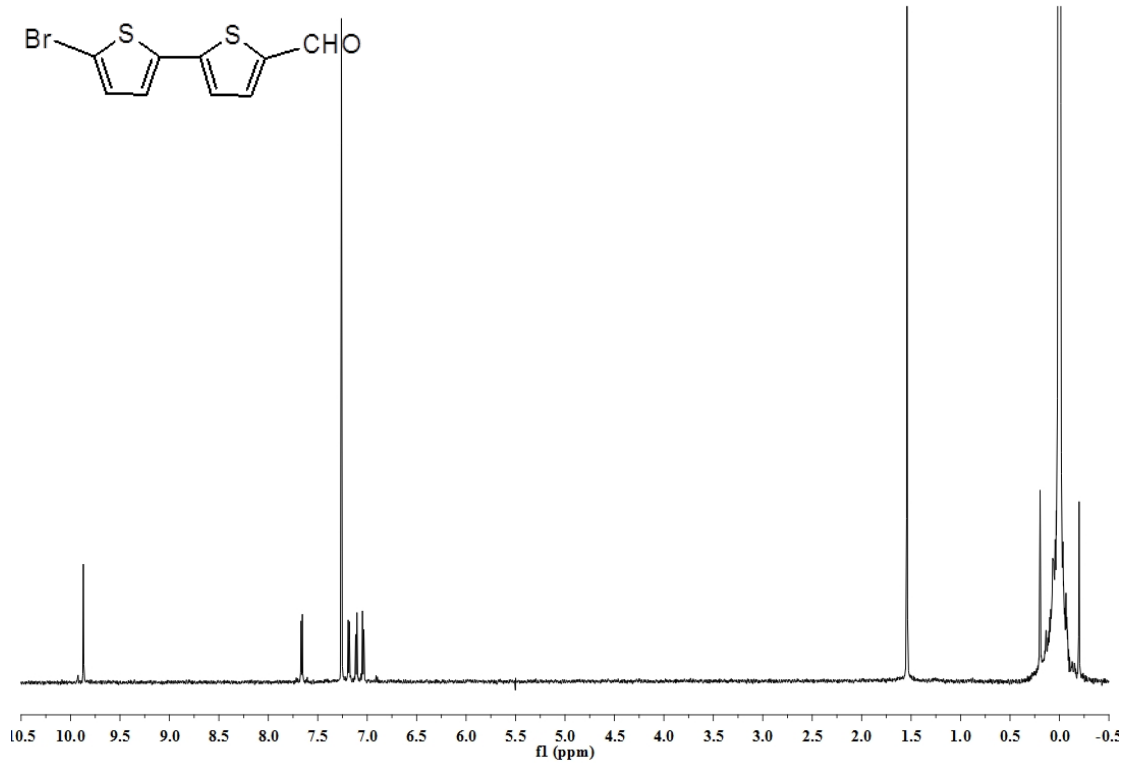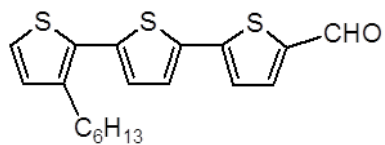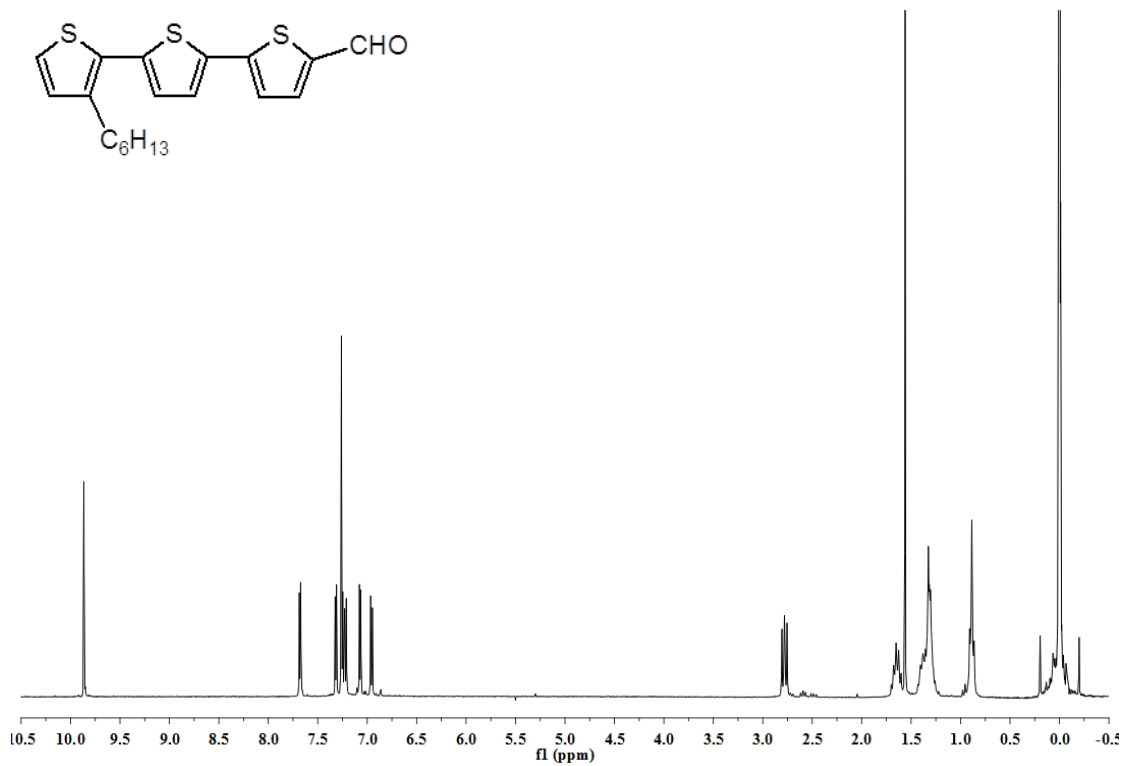

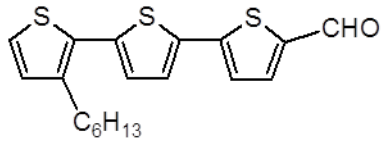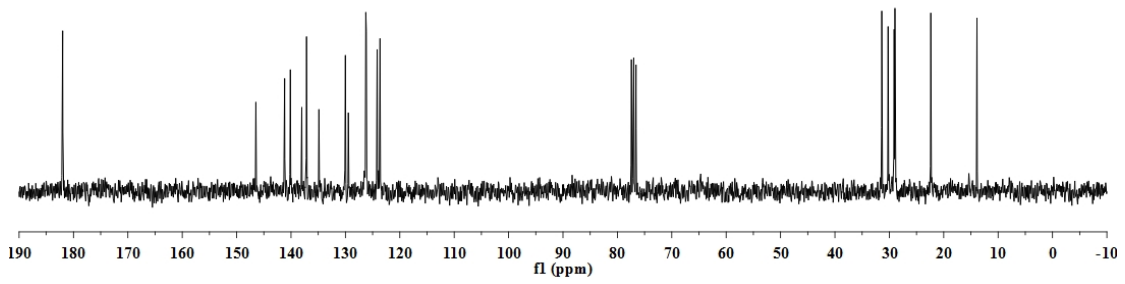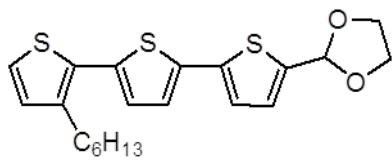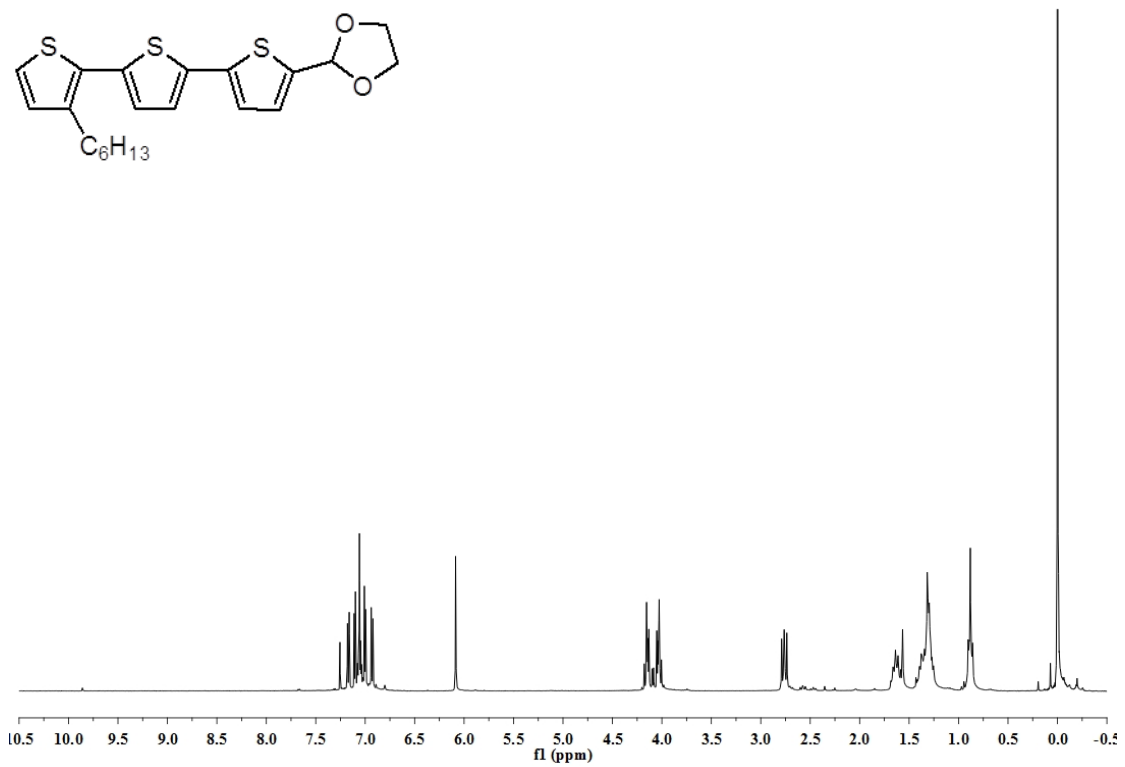

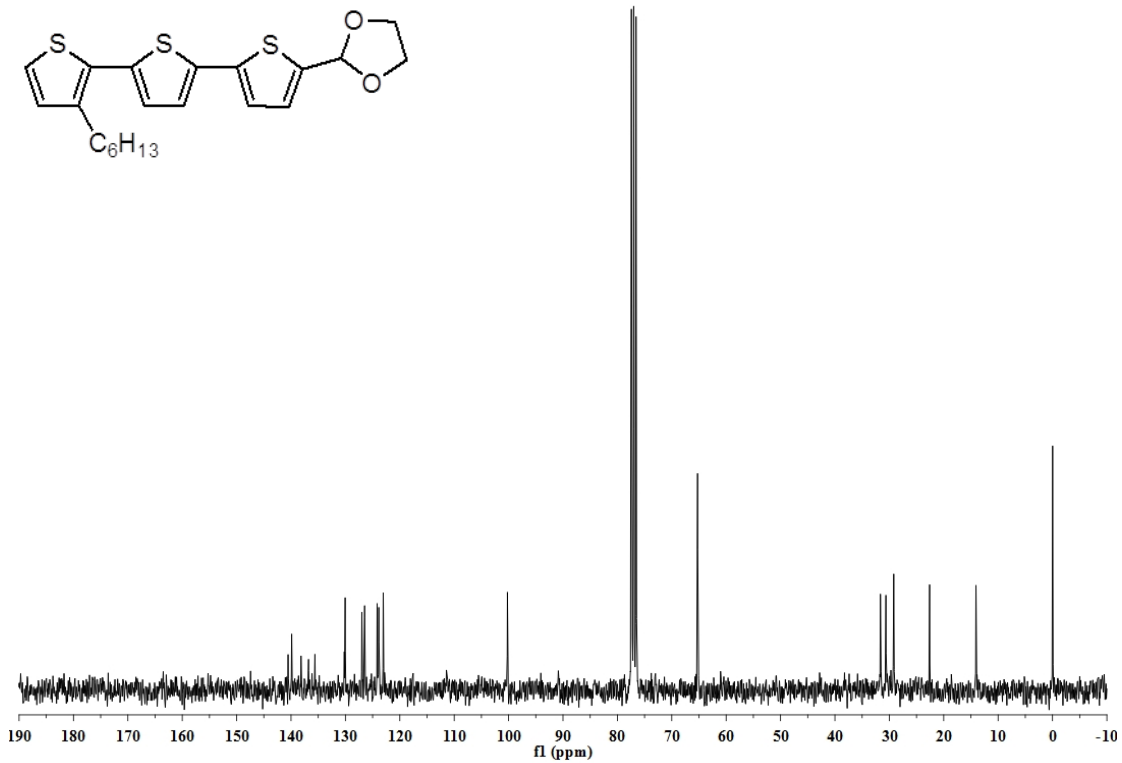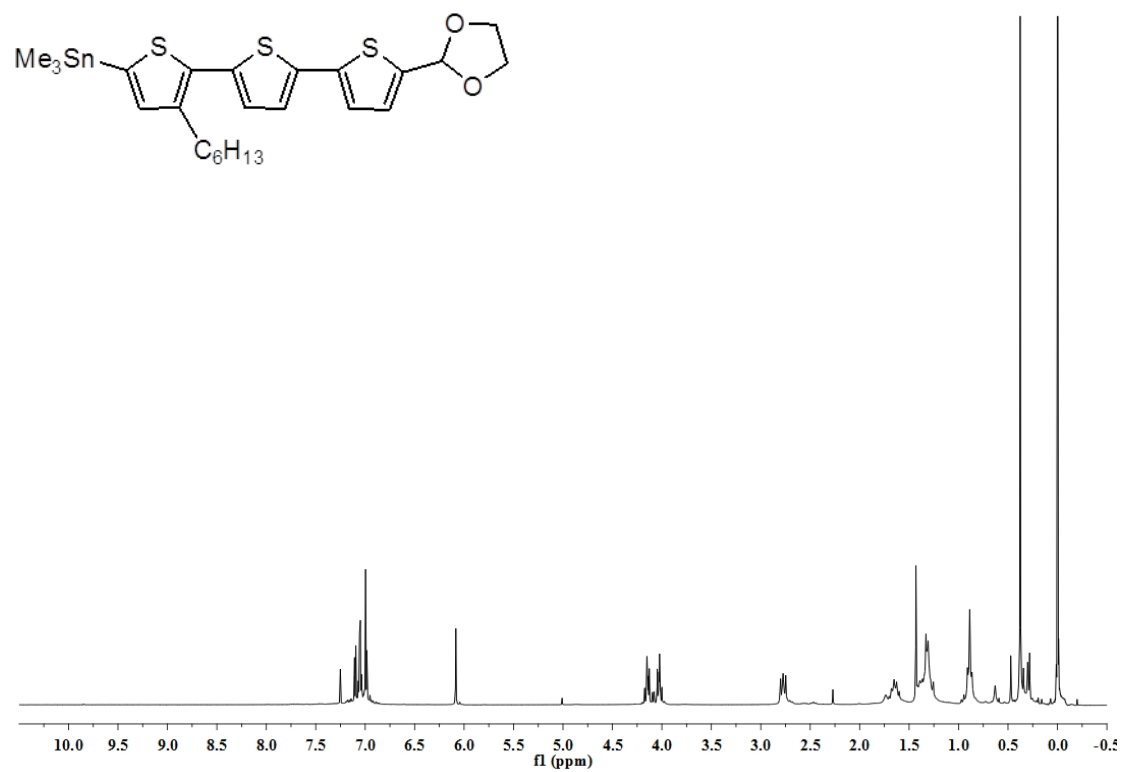

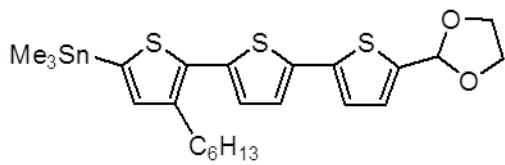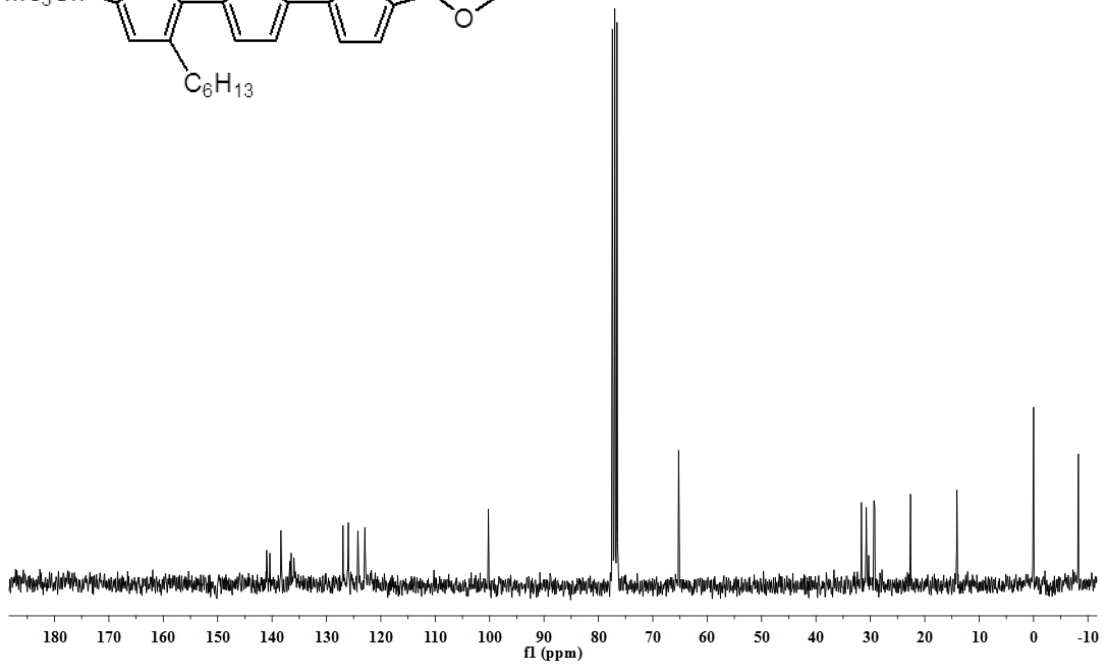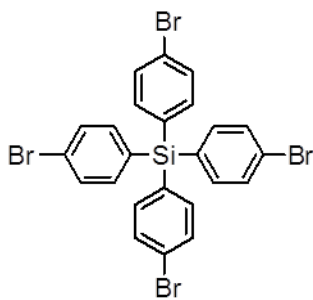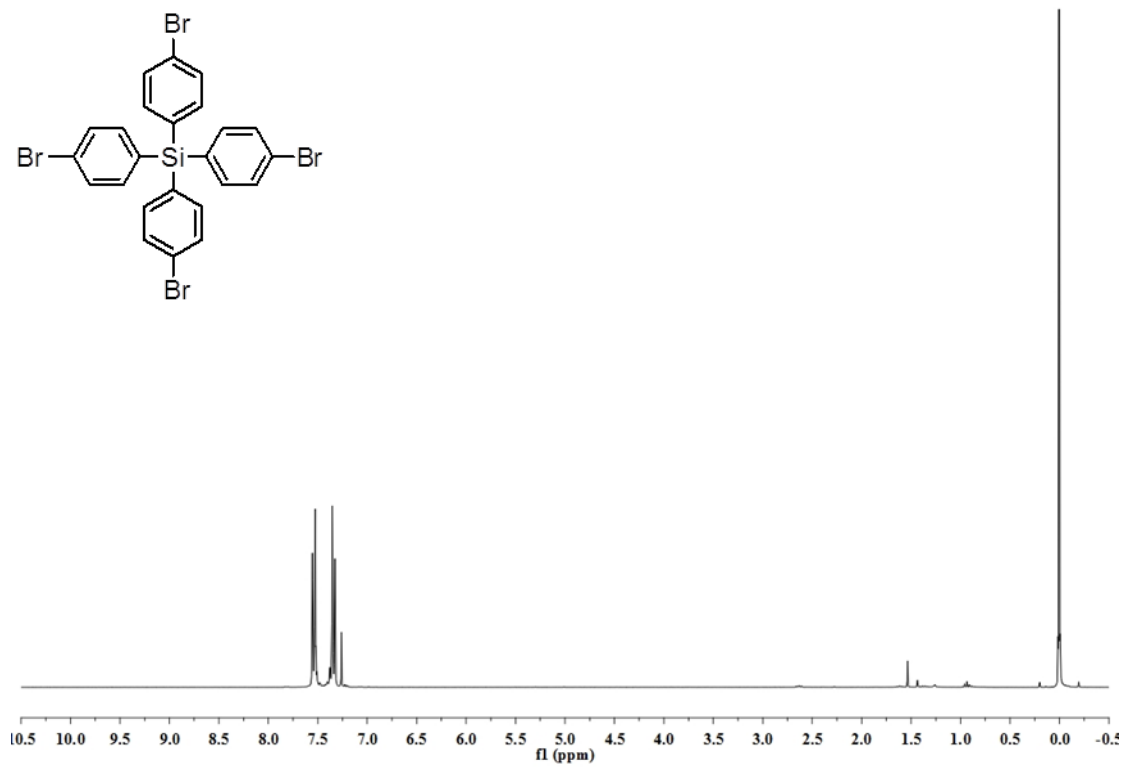

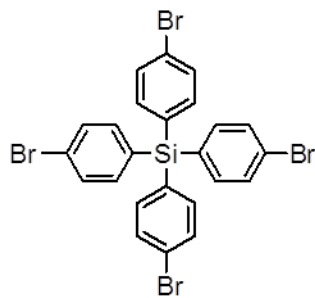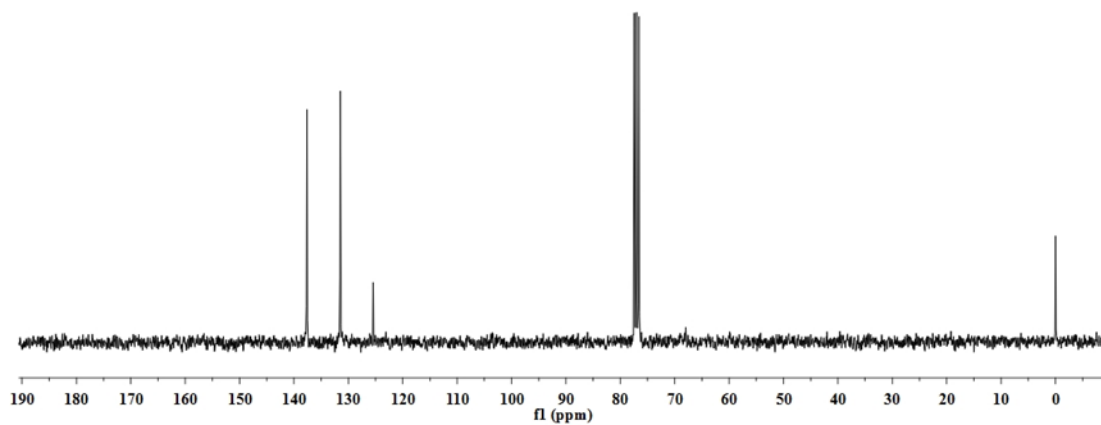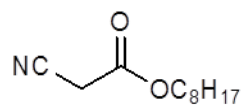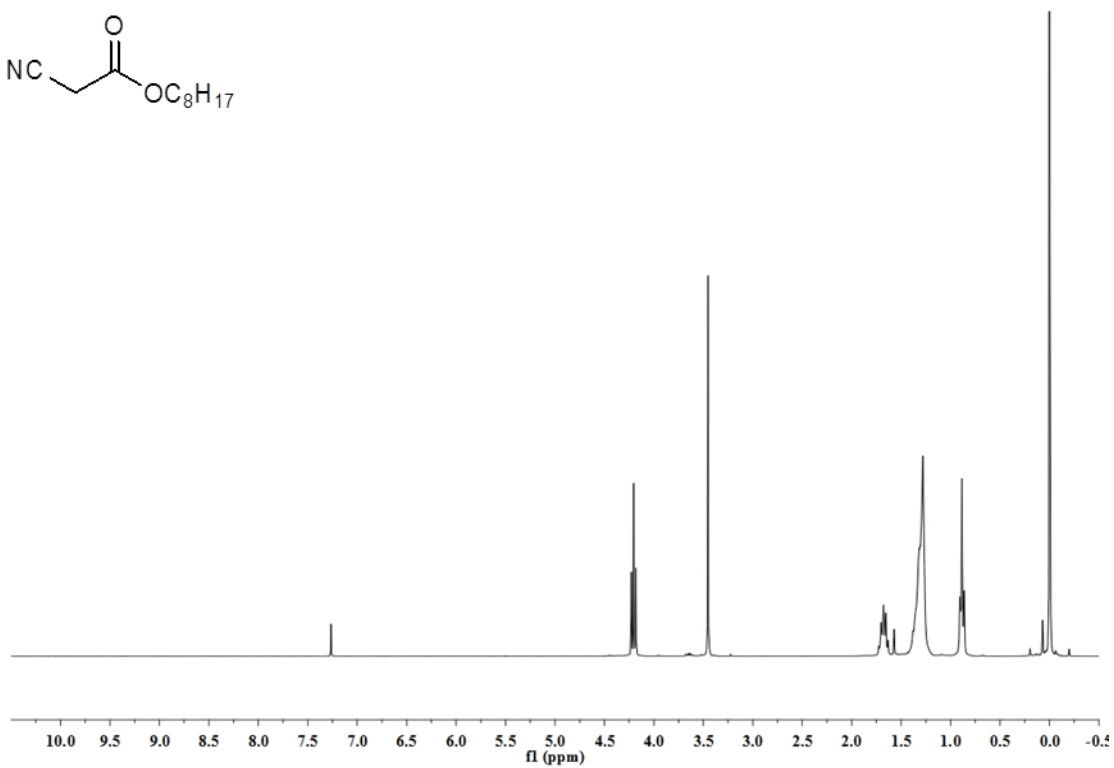

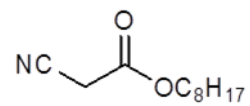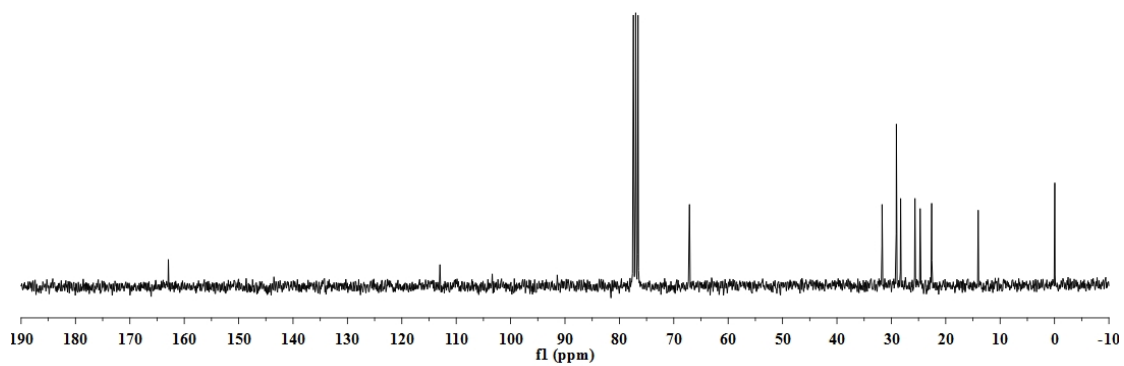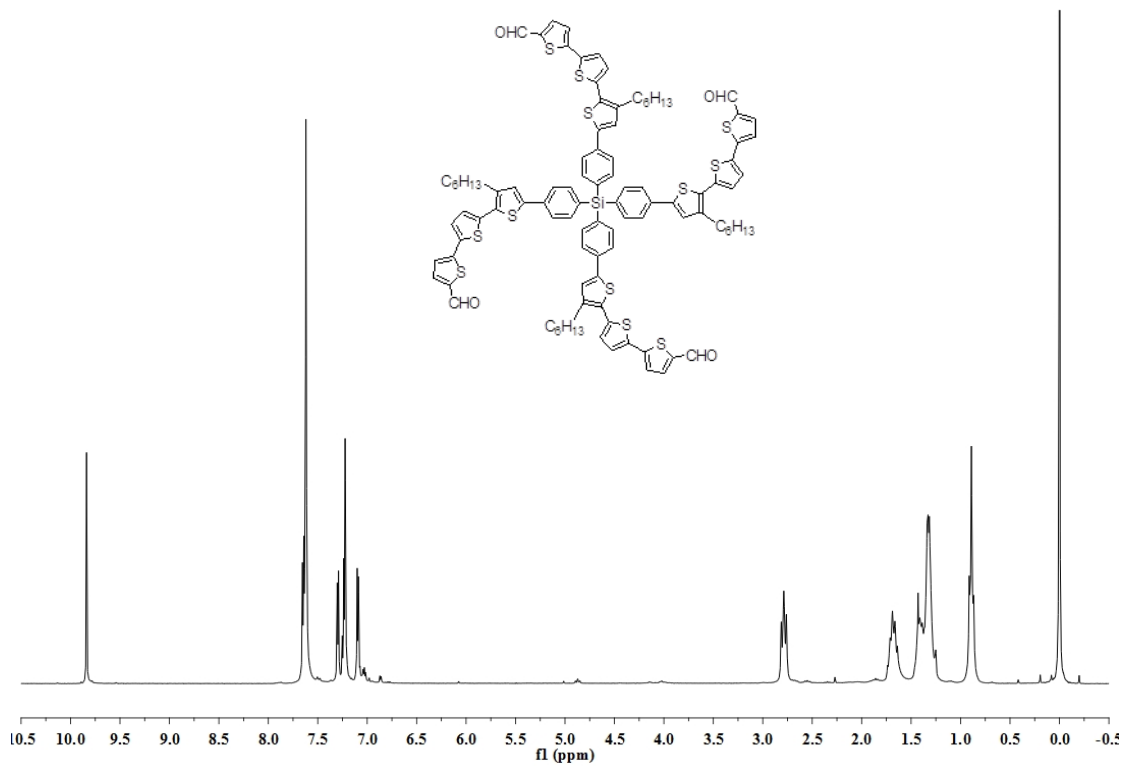

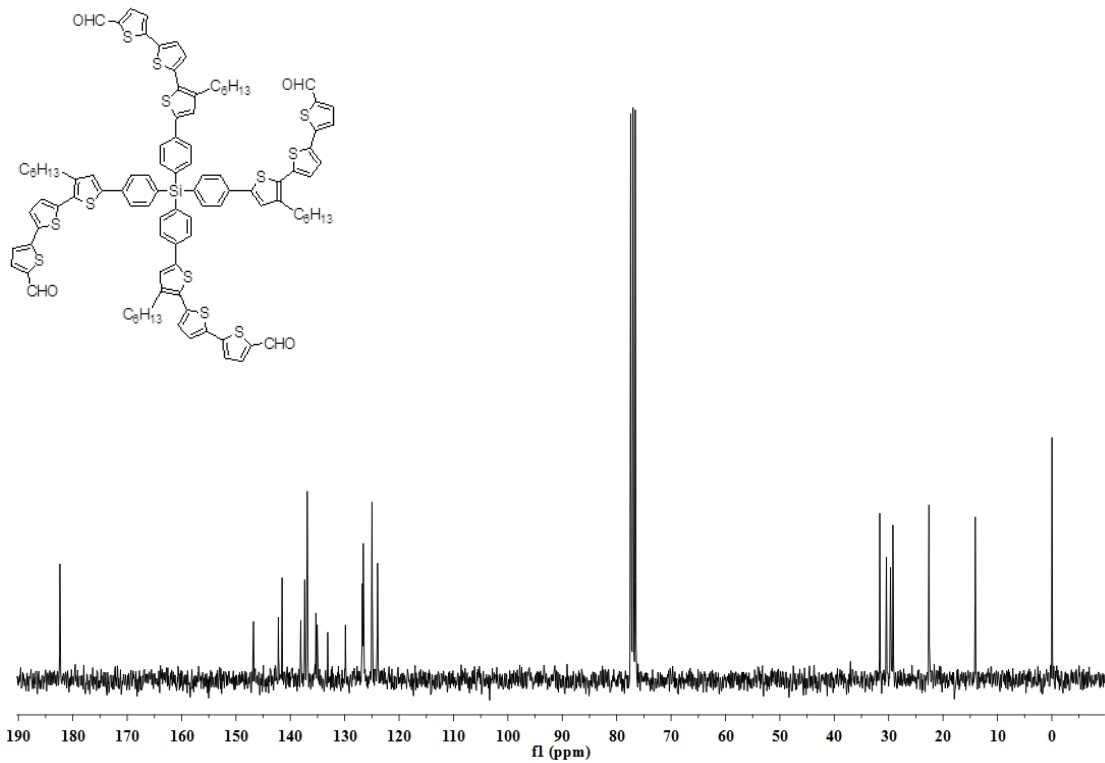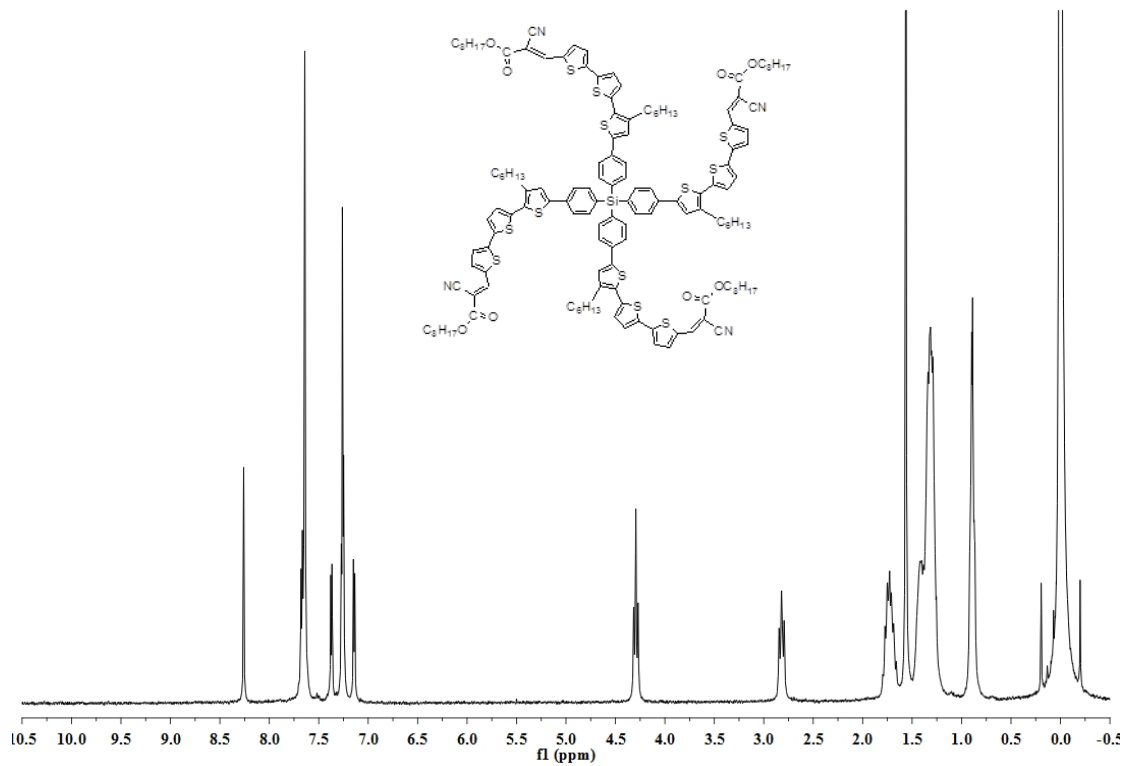

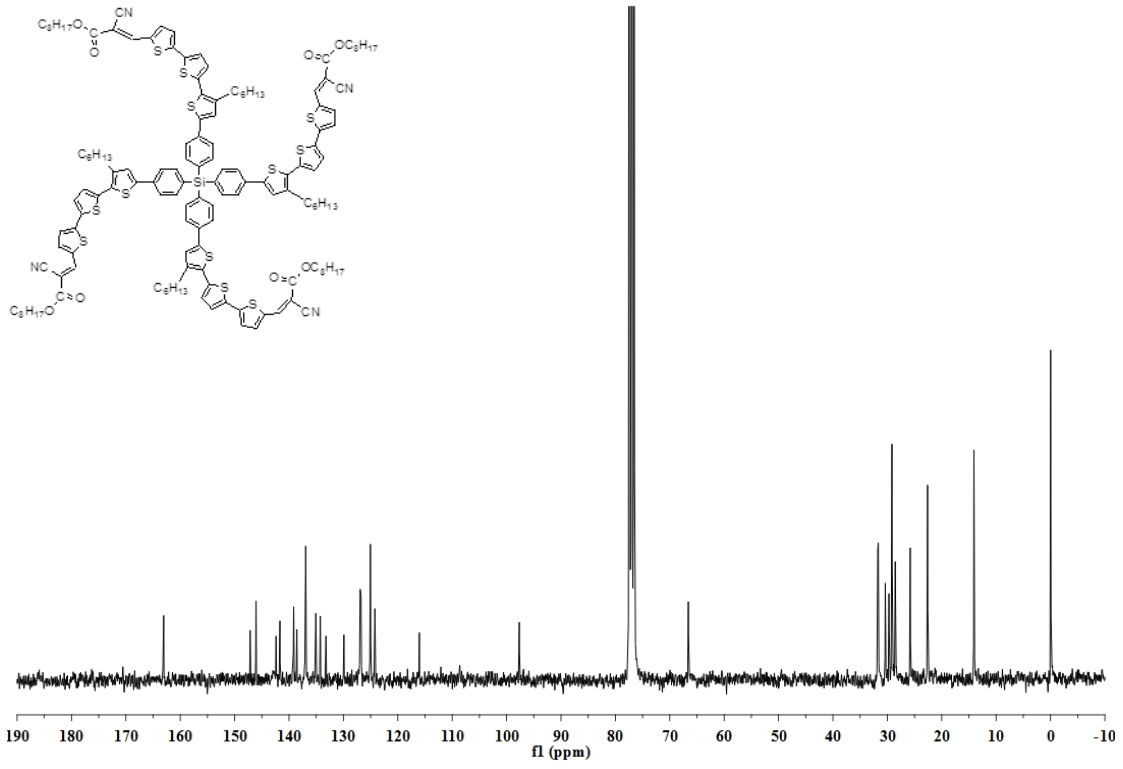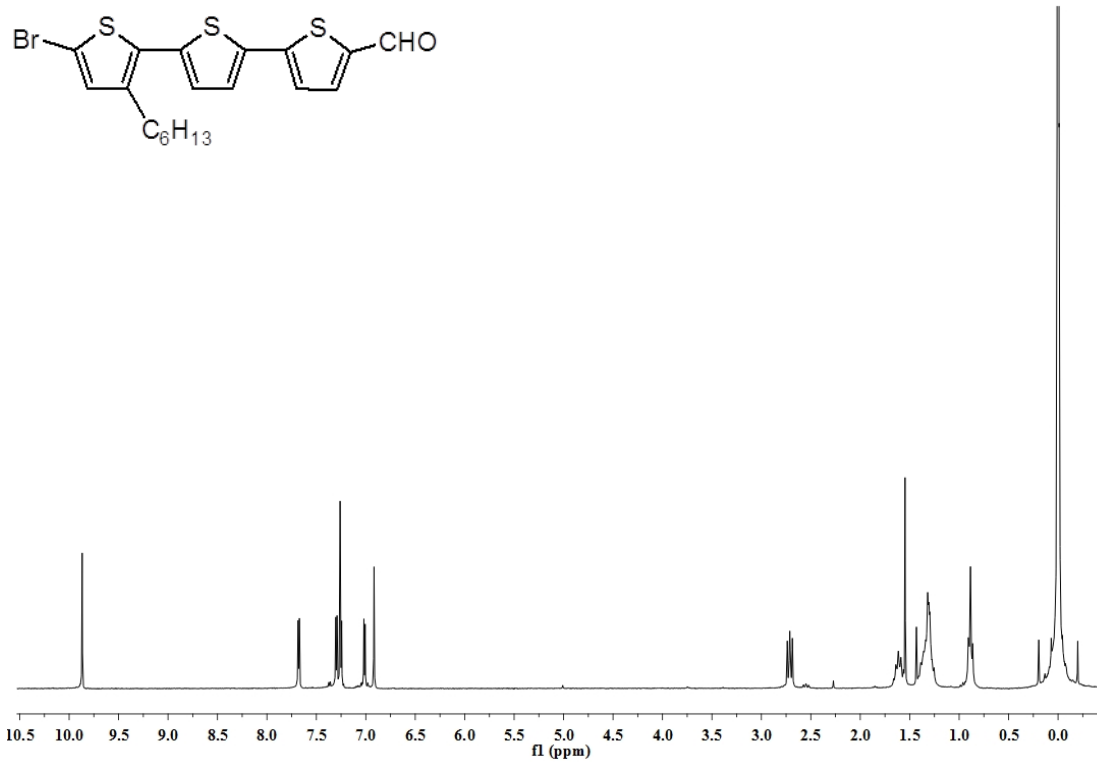



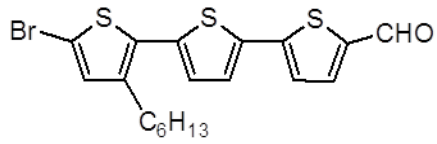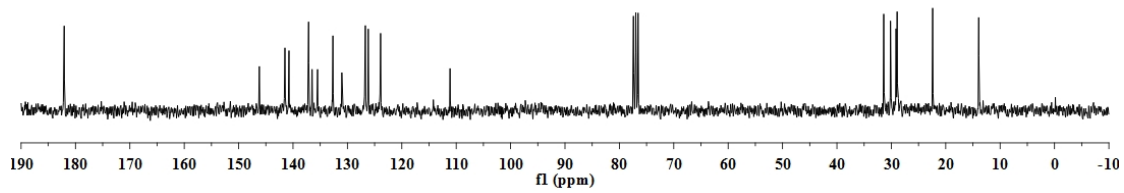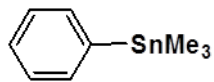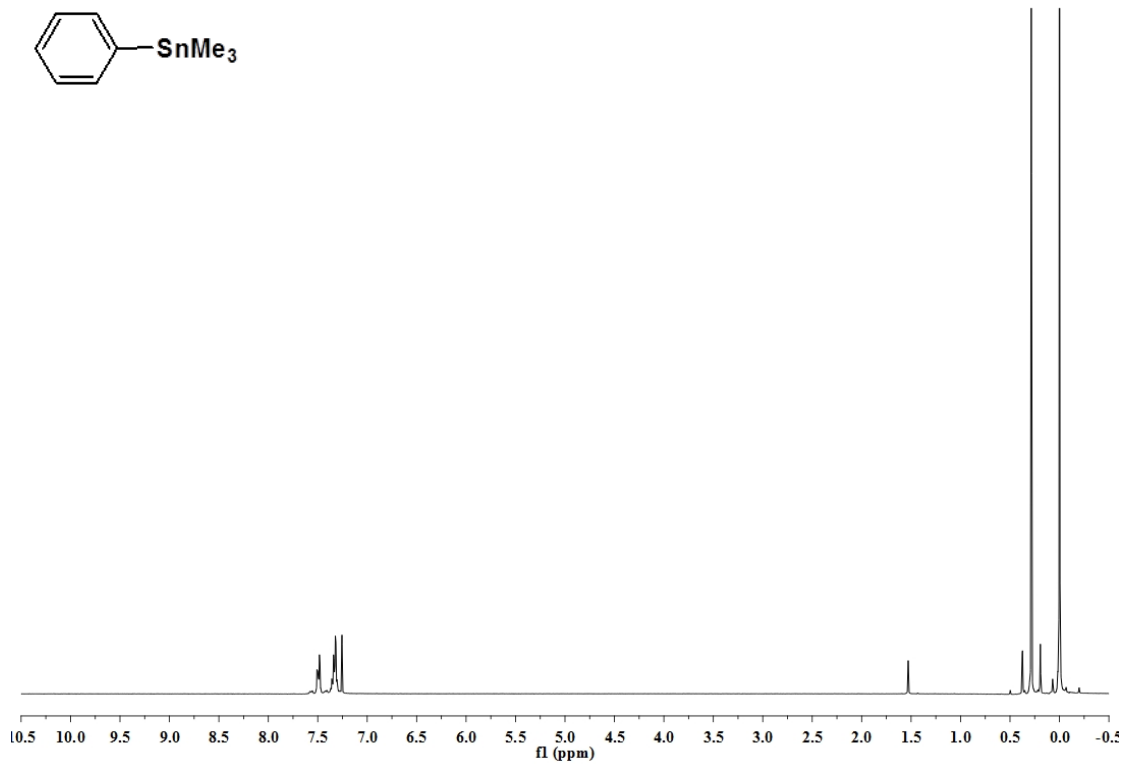

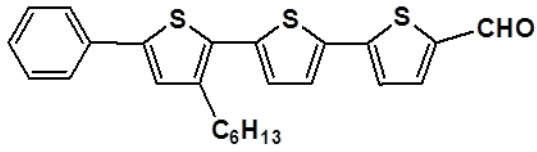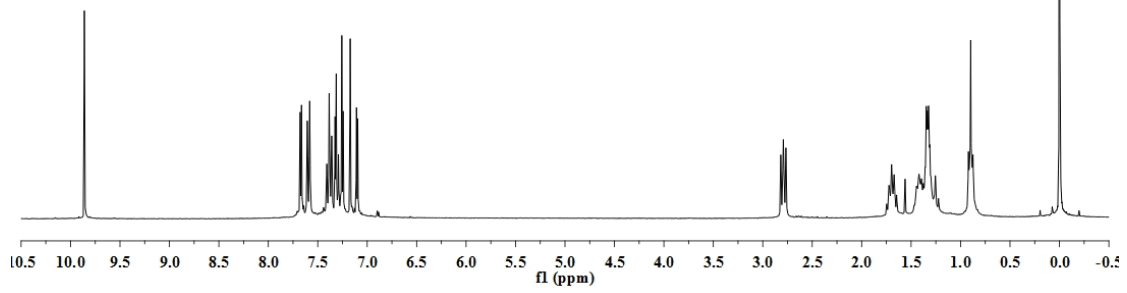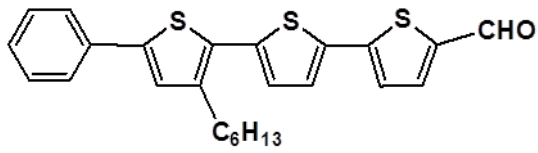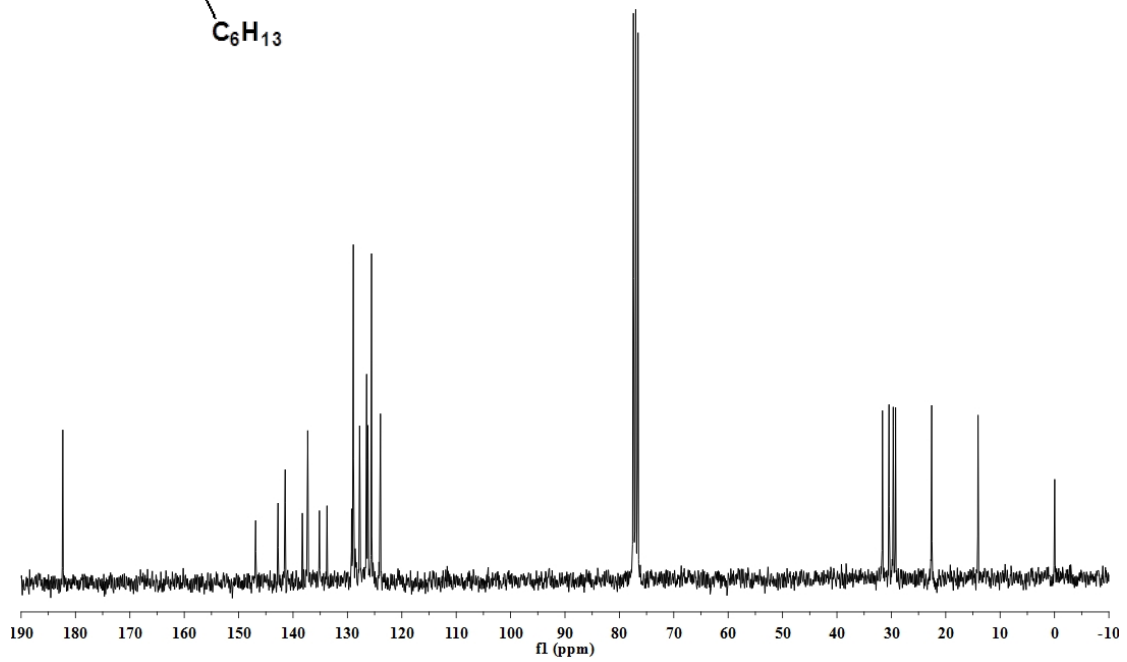

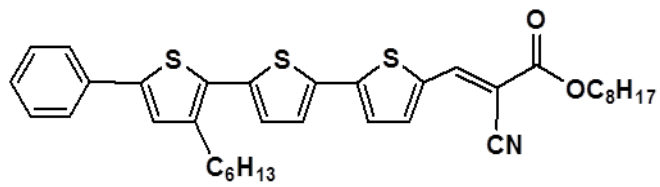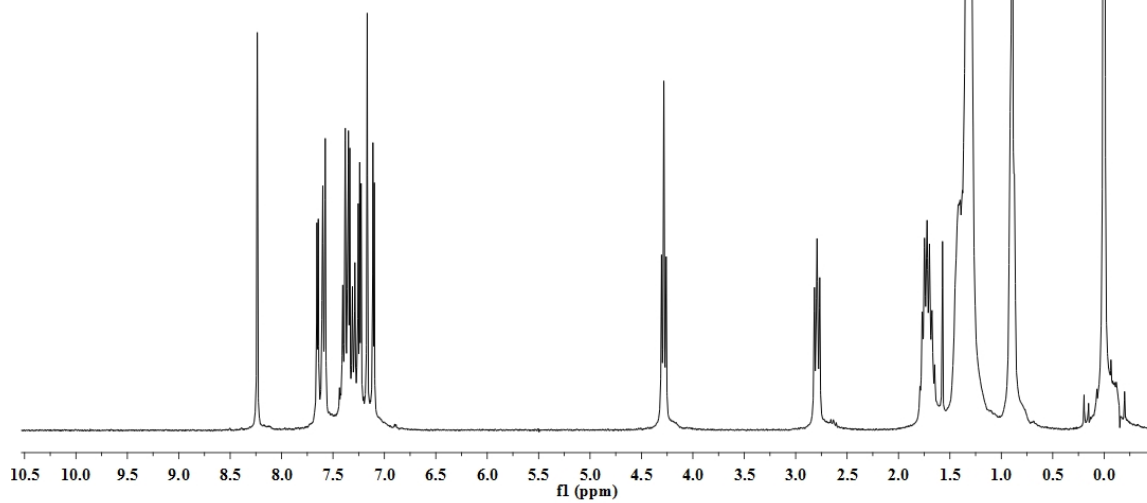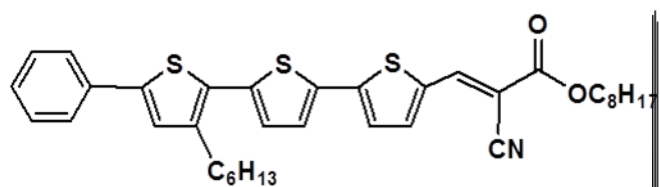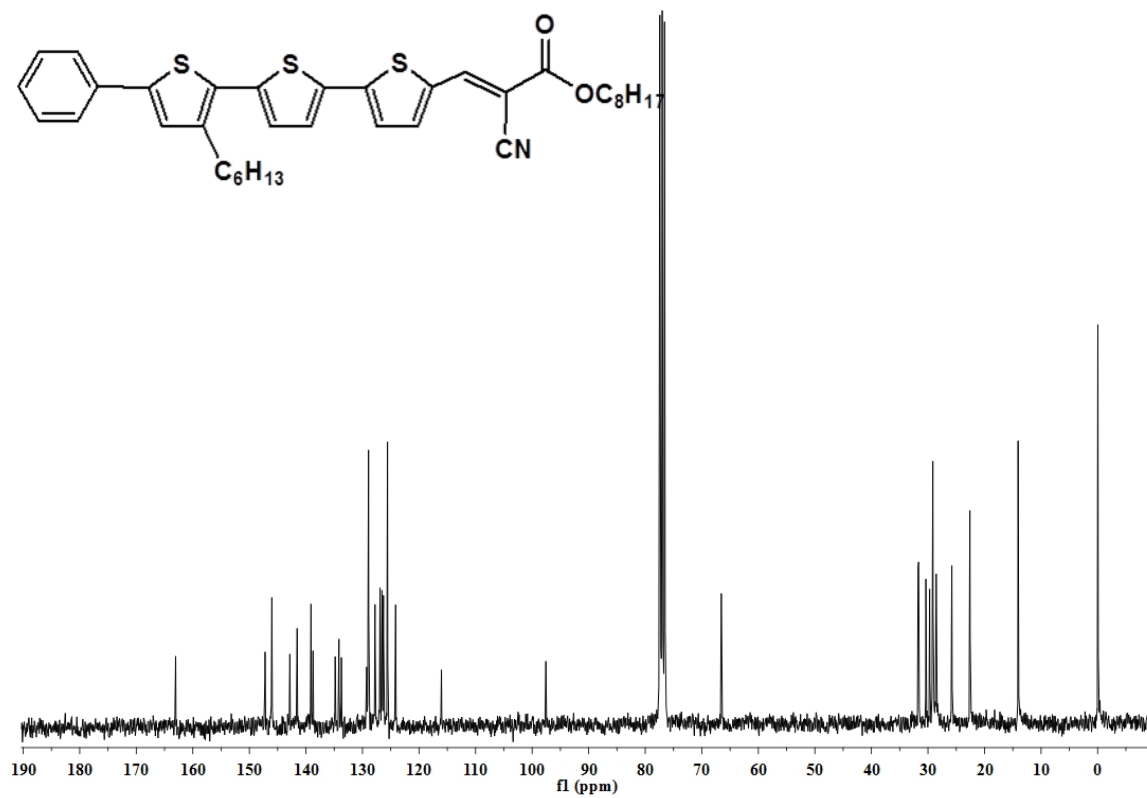

Supplement: c4ta05405a1.pdf [file c4ta05405a1.pdf]
